# Supplementary material
Source: Frontiers journal article supplement (https://www.frontiersin.org/articles/372501)
Supplement: Image_1.PDF [file Image_1.PDF]

## SUPPLEMENTARY FIGURE

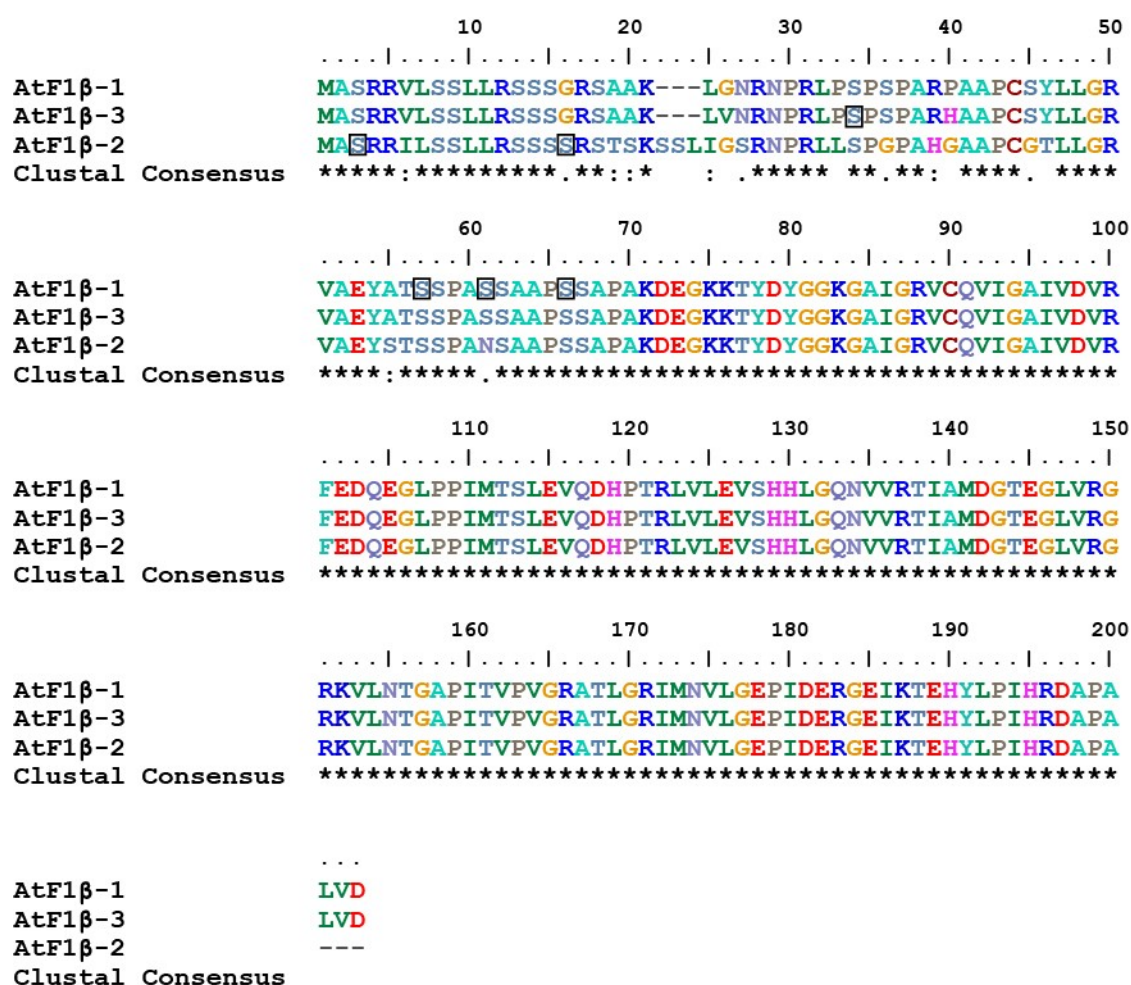

**Supplementary Figure S1.** Multiple a.a. sequence alignment of F1β-1/2/3 and NpF1β. Boxes indicate experimentally-proven phosphorylation sites.
